# Supplementary material for: Nasal administration of anti-CD3 mAb (Foralumab) downregulates NKG7 and increases TGFB1 and GIMAP7 expression in T cells in subjects with COVID-19
Source: PubMed Central journal article supplement (PMC10243127; doi:10.1073/pnas.2220272120), 2023-03-07
Supplement: pnas.2220272120.sapp.pdf [file pnas.2220272120.sapp.pdf]

## Supporting Information for

**Nasal administration of anti-CD3 mAb (Foralumab) downregulates *NKG7* and increases *TGFb1* and *GIMAP7* expression in T cells in subjects with COVID-19.**

Thais G. Moreira<sup>1</sup>, Christian D. Gauthier<sup>1</sup>, Liam Murphy<sup>1</sup>, Toby B. Lanser<sup>1</sup>, Anu Paul<sup>1</sup>, Kimble T. F. Matos<sup>2</sup>, Davide Mangani<sup>1</sup>, Saef Izzy<sup>1</sup>, Rafael M. Rezende<sup>1</sup>, Brian C. Healy<sup>1</sup>, Clare M. Baecher-Allan<sup>1</sup>, Tanuja Chitnis<sup>1</sup>, Vijay Kuchroo<sup>1</sup>, Howard L. Weiner<sup>1</sup>

**Correspondence:** [hweiner@rics.bwh.harvard.edu](mailto:hweiner@rics.bwh.harvard.edu) / [tmoreira@bwh.harvard.edu](mailto:tmoreira@bwh.harvard.edu)

\* Howard L. Weiner / Thais Garcias Moreira  
Ann Romney Center for Neurologic Diseases  
Department of Neurology,  
Brigham and Women's Hospital,  
Harvard Medical School, Boston, MA, USA.  
60 Fenwood Rd, Boston, MA. 02115 USA

### **This PDF file includes:**

Figures S1 to S7  
Tables S1 and S2

### **Other supporting materials for this manuscript include the following:**

Datasets S1 to S8

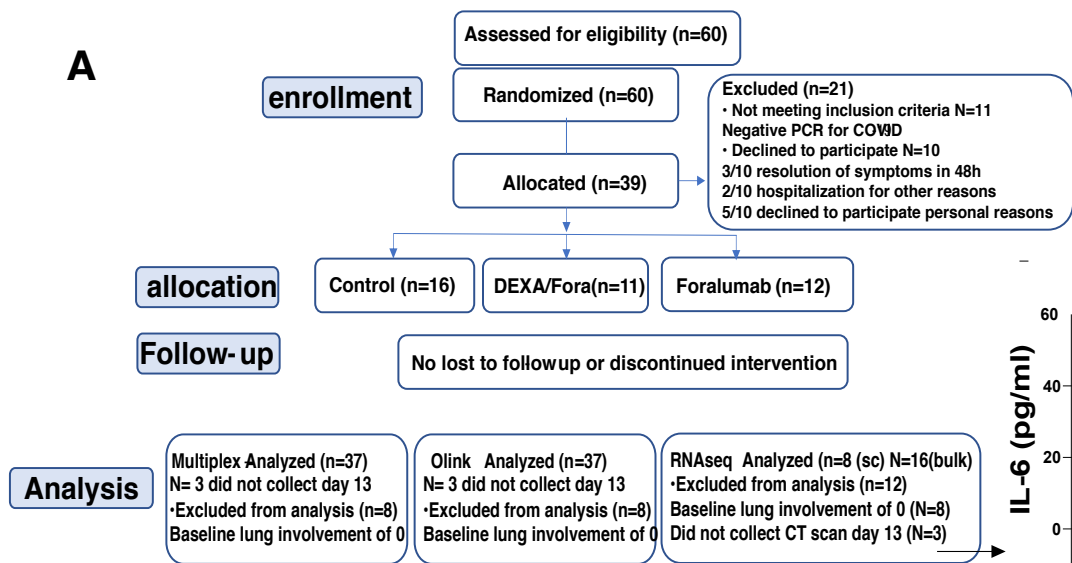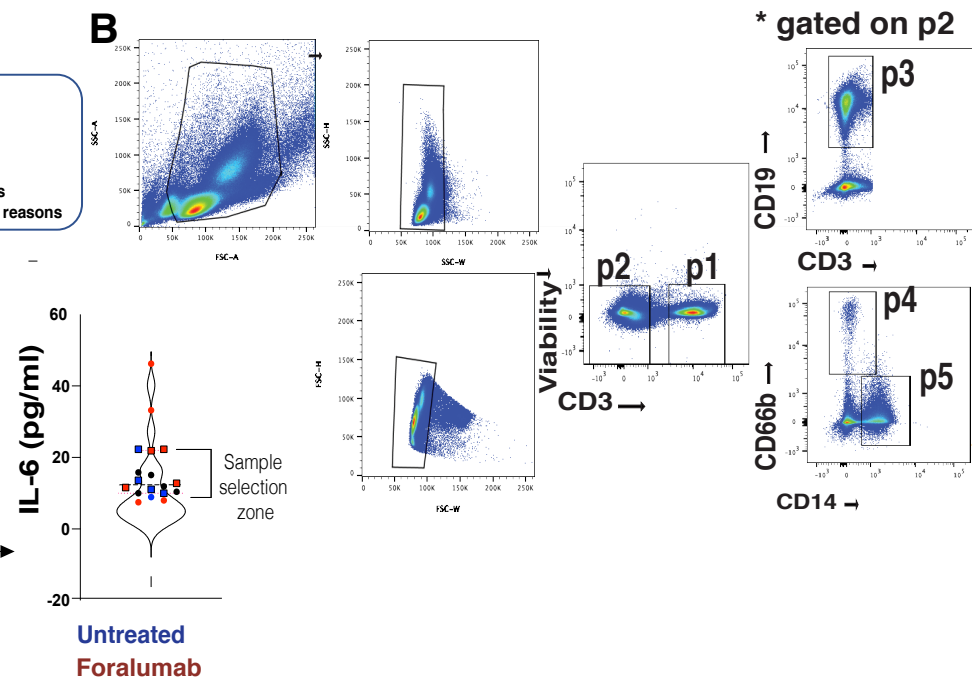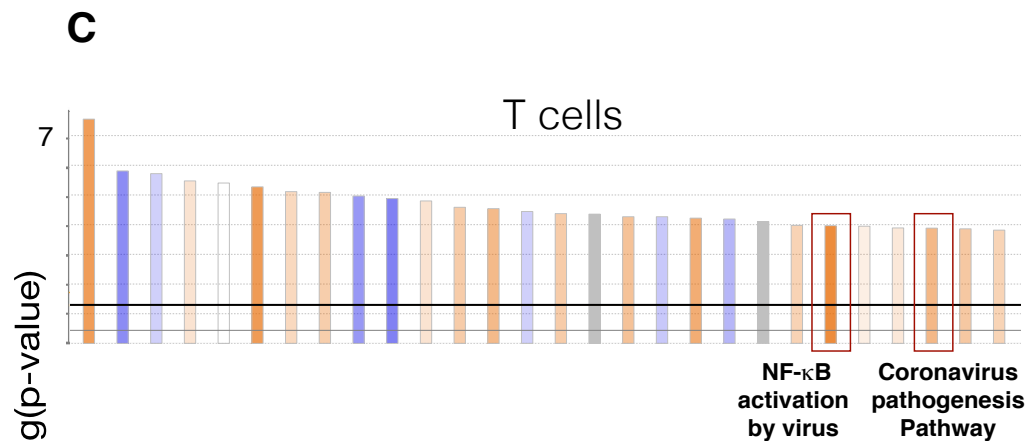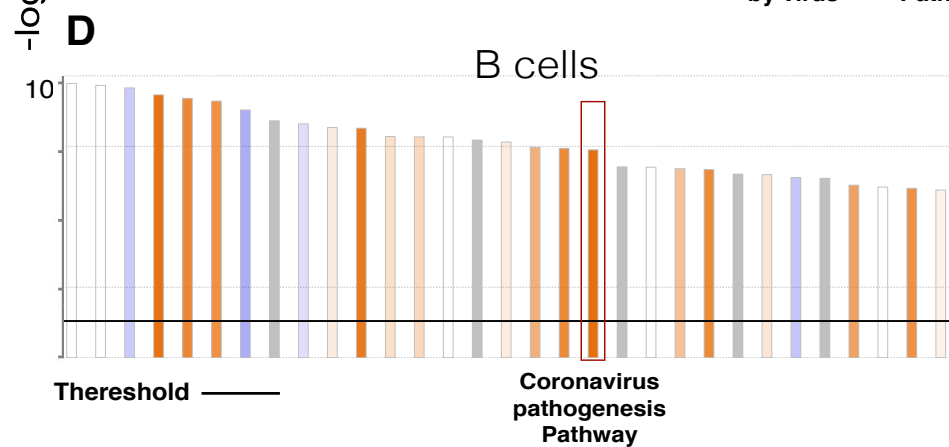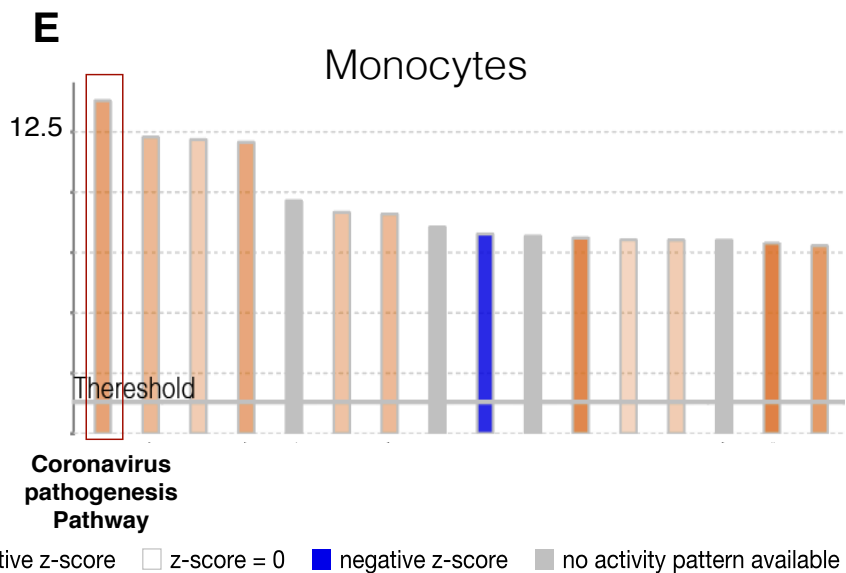

**Figure S1. Gating strategy for RNA-sequencing and Ingenuity Pathway Analysis** **A)** Sample selection for RNA-sequencing. 39/60 patients were allocated. Samples from Fora/Dexa group were not elected for this study and thus 28/39 patients were selected. Further, 12/28 samples were removed because patients did present lung involvement or did not collect CT scan on endpoint and thus could not be evaluated. We then used IL-6 serum levels at baseline to define a sample selection zone that excluded skewed IL-6 serum levels. Samples within median and interquartile range were used for single cell RNA-seq analysis and it is shown in squared shape. Bulk RNA-seq **B)** Gating strategy for cell sorting: bulk RNA-seq (Smart-Seq2) and 10x single cell RNA-seq. PBMCs were stained with viability dye, CD3, CD19, CD66b and CD14 and FACS-sorted. Cells were gated on singlet+ Live+ cells. P1 (CD3<sup>+</sup>), P3 (CD19<sup>+</sup>) and P5 (CD14<sup>+</sup>) were gated on P2, CD3<sup>-</sup>. **C-E)** Ingenuity Pathways Analysis on DEG genes ( $p < 0.05$ ) of comparisons between healthy volunteers and COVID-19 subjects in CD3<sup>+</sup> T cells, CD19<sup>+</sup> B cells and CD14<sup>+</sup> monocytes. N=7 healthy volunteers (HV), N=8 untreated controls and N=8 Foralumab treated

**A**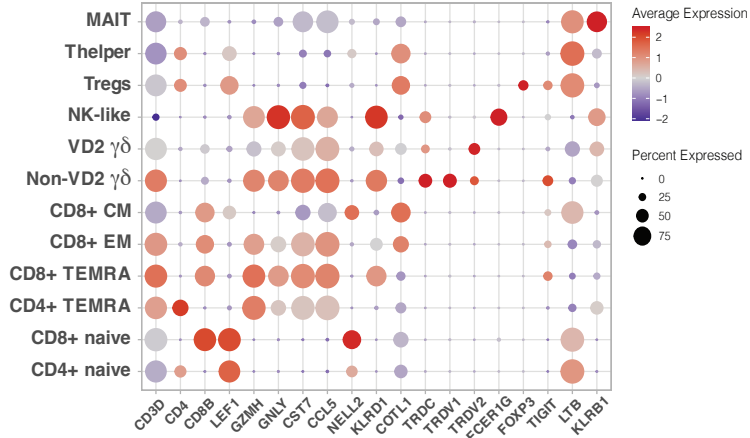**B**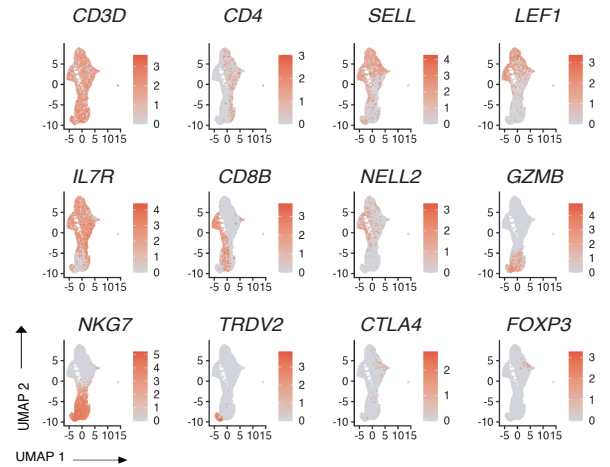**C**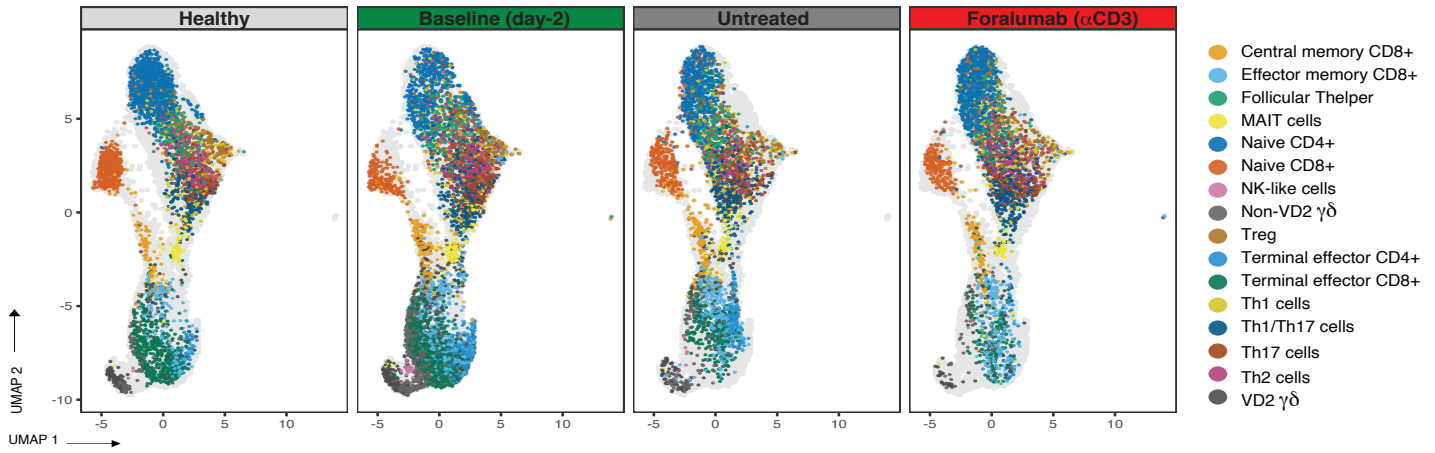**D**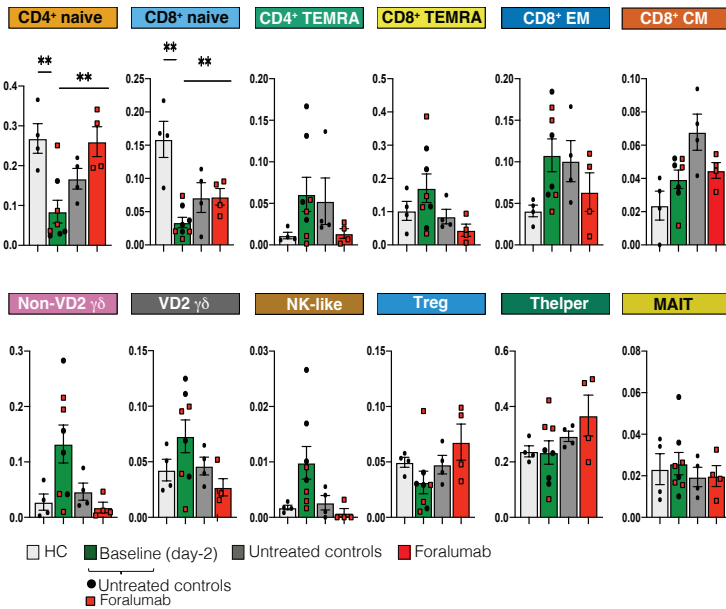**E**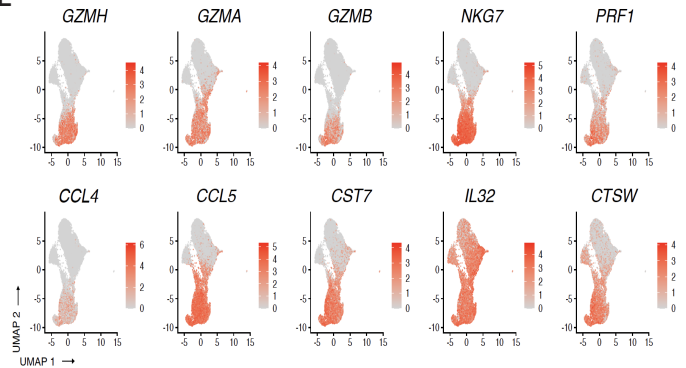

**Figure S2. T cell subtyping.** **A)** Canonical cell markers for T cell subsets. **B)** UMAP plots of T cells showing localization of CD3<sup>+</sup> cell subset markers. **C)** CD3<sup>+</sup> subsets including T helper stratification into Th1, Th2 and Th17 subsets. **D)** Graphic representation T cell subset distribution in healthy controls, untreated and Foralumab treated COVID-19 subjects at baseline (day-2) and at day 10 shown in Fig1E. Bars represent mean±SEM. One-way ANOVA followed by Tukey *post hoc* analysis \*\* p<0.01. **E)** UMAP plots of T cells showing localization of effector genes.

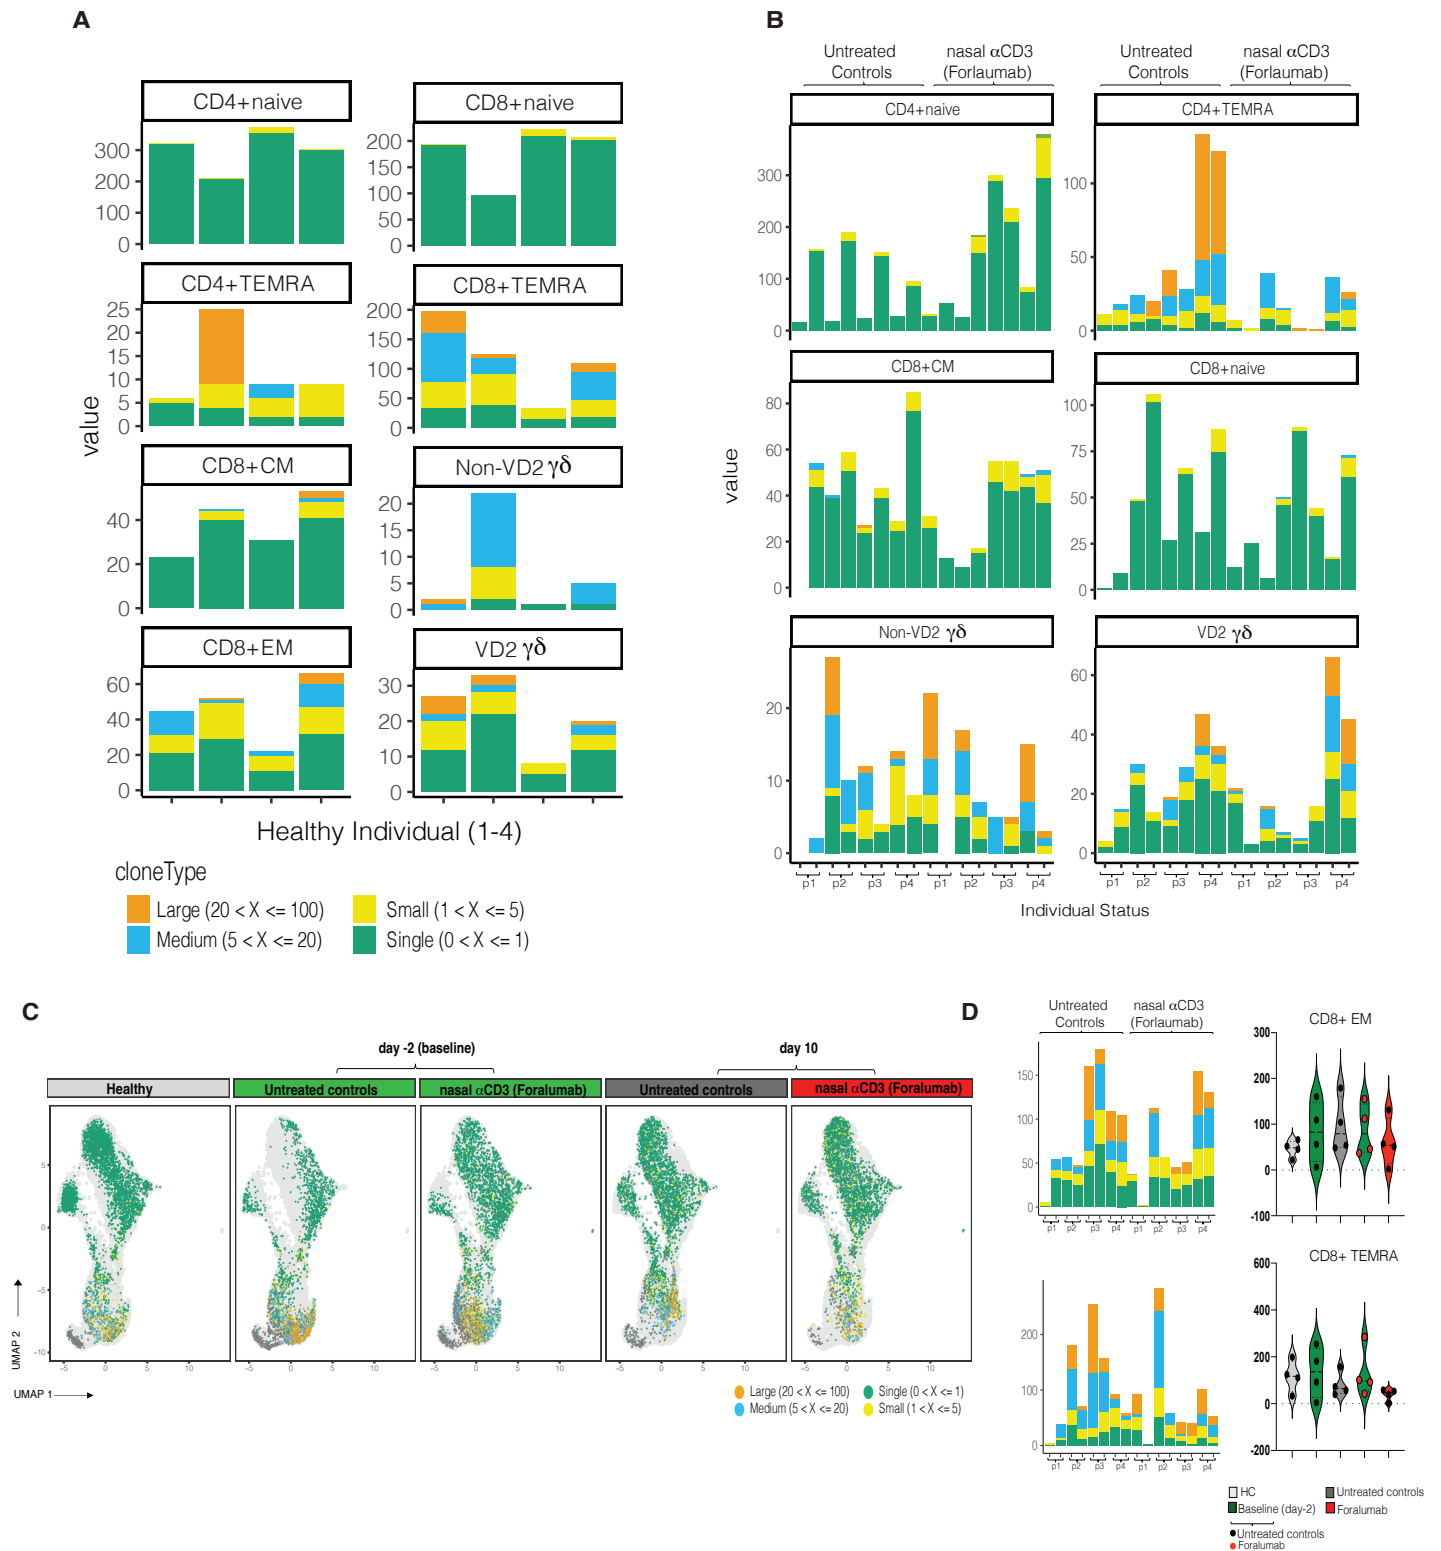

**Figure S3. TCR sequencing in Foralumab treated subjects. A, B)** TCR sharing patterns of specific T cell subsets by comparing usage of V(D)J genes on healthy controls (A), untreated controls vs. Foralumab treated subjects (B). **C)** Distribution within UMAP plots of T cells subsets. **D)** Violin plots showing the frequency of clonal T cells in CD8<sup>+</sup> TEMRA and CD8<sup>+</sup> CM cells (Median+IQR). Graphs show percentage of each clonal type and individual status. 4 healthy volunteers, 4 untreated controls (before and after) and 4 Foralumab treated subjects (before and after) were studied.

**A**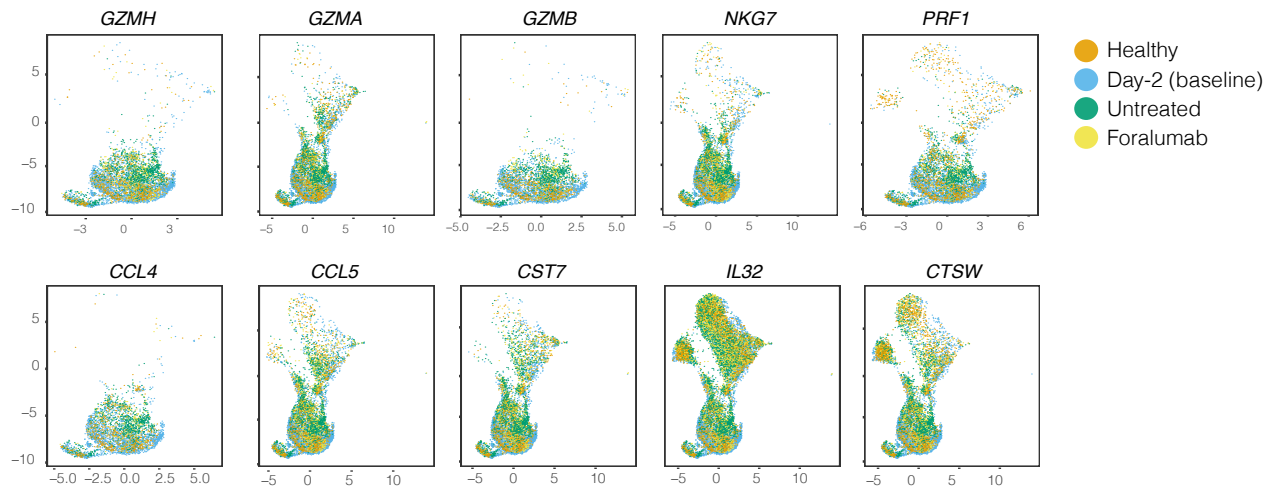**B**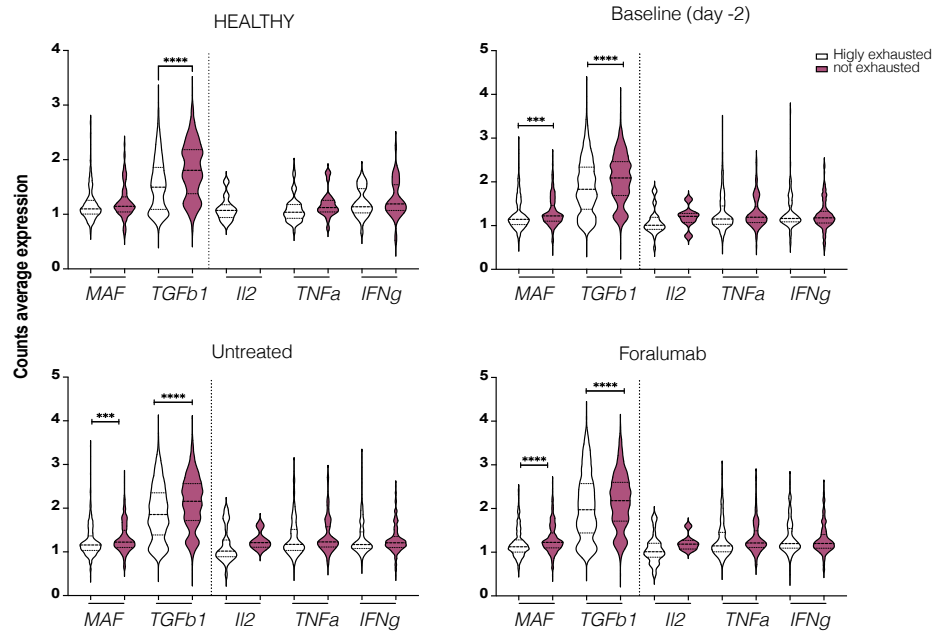**C**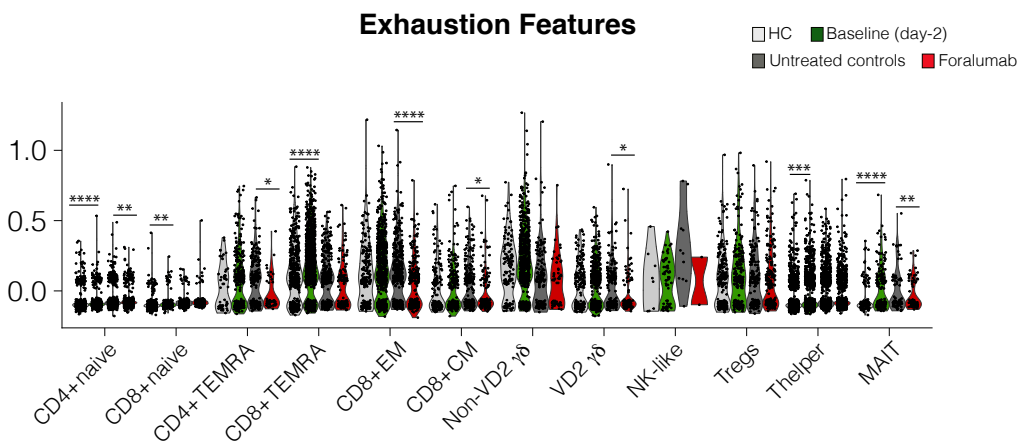

**Figure S4. Effector gene cluster and exhaustion modules in CD3+ T cells.** **A)** UMAP plots of T cells showing localization of effector genes in CD3+ cells across treatment. **B)** Exhausted score of  $>0.01$  was used to determinate highly exhausted cells and compared to low/not exhausted cells ( $<0.01$ ). *MAF*, *TGFB1*, *IL2*, *TNFa* and *IFNg* gene expression in exhausted and not exhausted cells is compared and shown in Violin-plots (Median $\pm$ IQR). **C)** Distribution of exhaustion score within UMAP plots of CD3+ T cells subsets in in healthy controls, untreated COVID19 subjects and Foralumab treated subjects at baseline (day-2) and at day 10. Violin plots (Median $\pm$ IQR) with individual points is shown. HC= healthy controls. One-way ANOVA, followed by Tukey *post hoc* analysis was performed and comparison between healthy vs. day-2 and untreated vs Foralumab is shown. \*  $P < 0.05$ , \*\*  $P < 0.01$ , \*\*\*  $p < 0.001$ , \*\*\*\*  $P < 0.001$ .



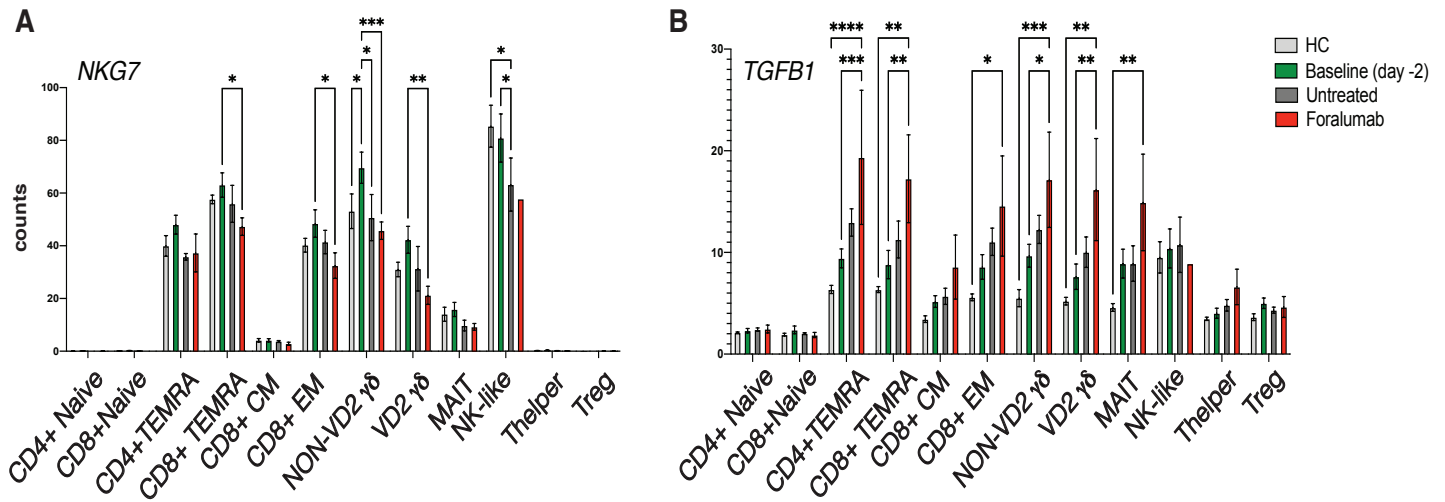

**Figure S5. A, B)** *NKG7* and *TGFBI* counts in CD3+ subsets in healthy controls, untreated and Foralunab treated COVID-19 subjects at baseline (day-2) and at day 10. *NKG7* (**A**) and *TGFBI* (**B**). Bars represent mean $\pm$ SEM. One-way ANOVA followed by Tukey *post hoc* analysis \*\*  $p < 0.01$ . \*  $P < 0.05$ , \*\*  $P < 0.01$ , \*\*\*\*  $P < 0.001$ .

**A**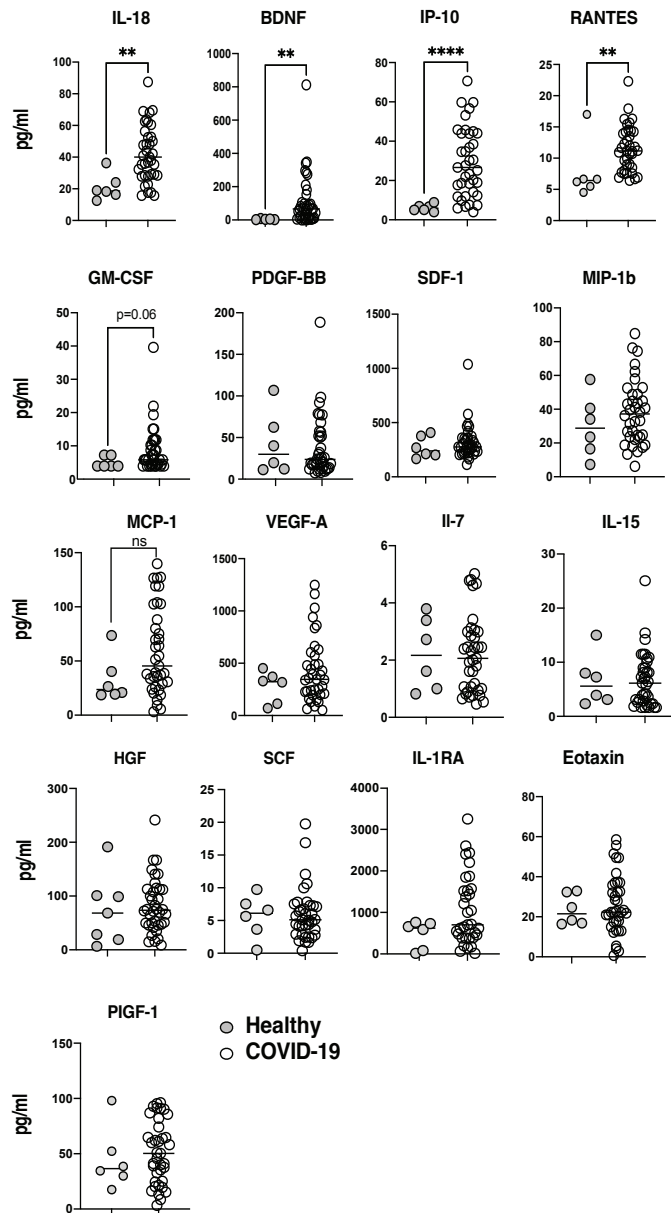**B**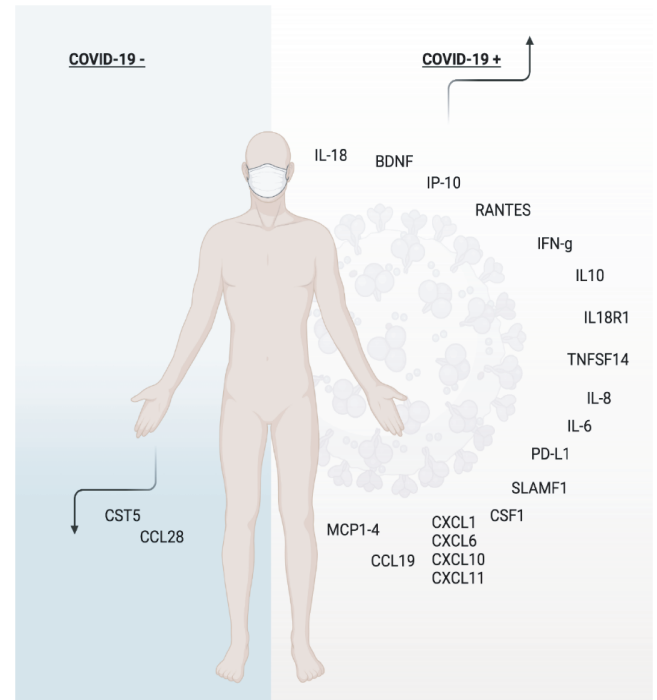

**Figure S6. Serum markers altered by COVID-19 detected by proteomics. A)** Comparison between healthy volunteers and COVID-19 subjects. Dots are individual values, bars represent mean $\pm$ SEM. Student's t test. Healthy = healthy controls. COVID-19 refers to all COVID-19 subjects at baseline (day-2). \*\* $p < 0.01$ , \*\*\*\*  $P < 0.001$ . **B)** Resume of up and downregulated serum markers obtained by Olink.

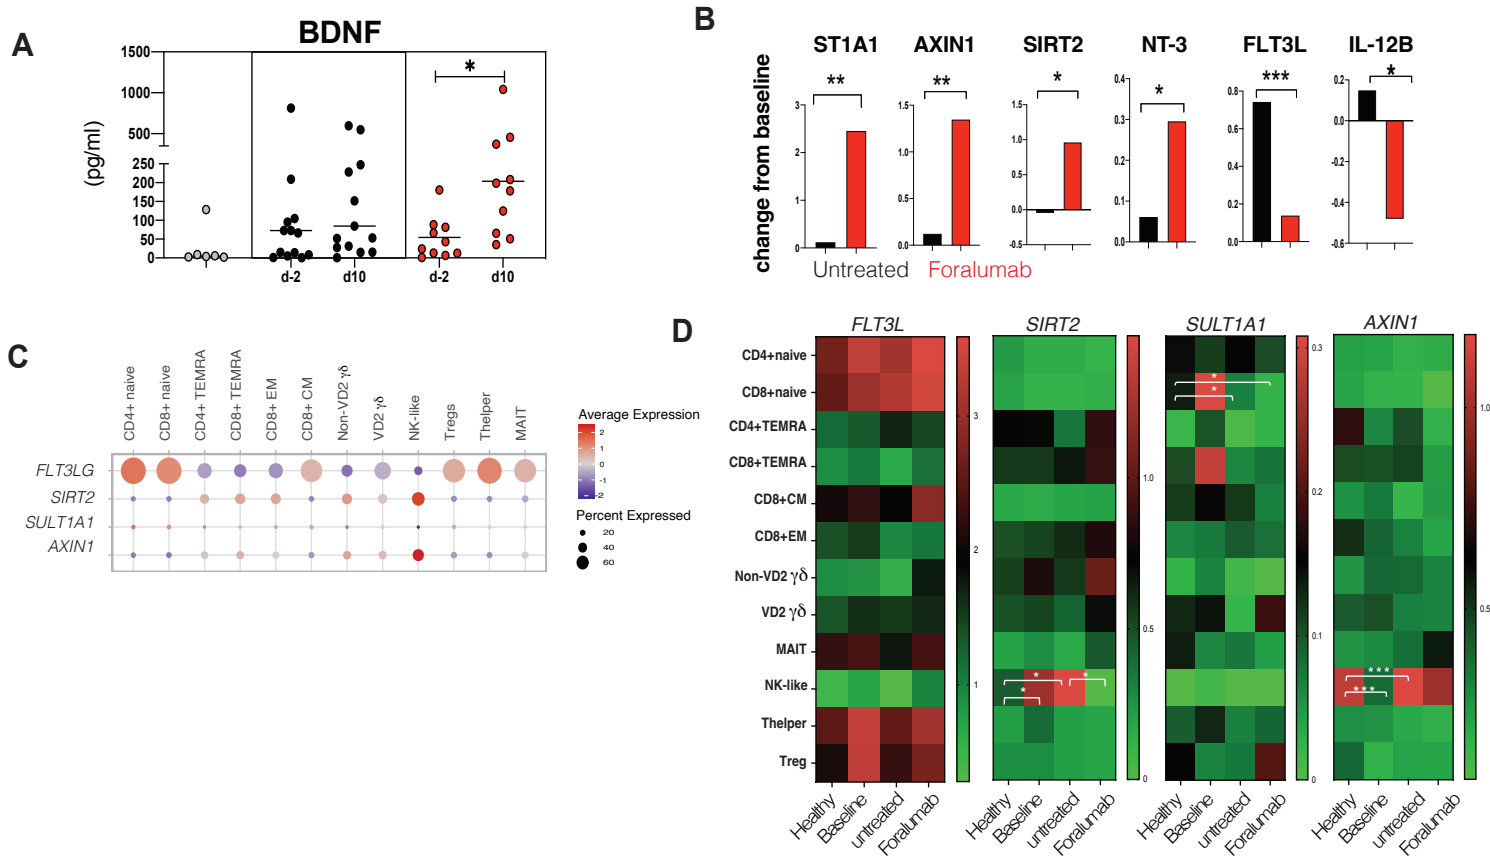

**Figure S7.** **A)** Serum BDNF before and after treatment measured by Multiplex. **B)** Serum ST1A1, AXIN1, SIRT2, NT-3, FLT3L and IL-12B change (before and after treatment) measured by Olink. Bars represent change from baseline. Student's t test. **C)** Dot plot showing average expression and percent of *FLT3G*, *SIRT2*, *SULT1A1* and *AXIN1* in CD3<sup>+</sup> cell subsets. **D)** Heat maps showing gene expression of the corresponding proteins found to be modulated by Foralumab treatment in sera. One-way ANOVA, followed by Tukey *post hoc* analysis was used for analysis in D. \* P < 0.05, \*\* P < 0.01, \*\*\*P = 0.001

**Table S1. Subject demographics**

|            |       | Foralumab    |            | Untreated    |             | Healthy controls |            |
|------------|-------|--------------|------------|--------------|-------------|------------------|------------|
|            | Total | Gender (F/M) | Age (yrs)  | Gender (F/M) | Age (yrs)   | Gender (F/M)     | Age (yrs)  |
| Proteomics | n=33  | 12 (10/2)    | 44.5 ± 11  | 15 (9/6)     | 31 ± 18.9   | 6 (5/1)          | 42.4 ± 7   |
| Bulk-RNA   | n=23  | 8 (7/1)      | 47.6 ± 9.1 | 8 (6/2)      | 39.8 ± 19.1 | 7 (2/5)          | 31.9 ± 5.1 |
| scRNAseq   | n=12  | 4 (3/1)      | 46.7 ± 8.3 | 4 (3/1)      | 48.7 ± 24.5 | 4 (2/2)          | 35.6 ± 2.5 |

Proteomics: Multiplex and Olink

Bulk-RNA: Smart2-seq

scRNAseq: 10X genomics

Age ± Standard Deviation

**Table S2: Serum Biomarkers before and after treatment measured by Multiplex**

|         | Control        |                |                            |        |          | Foralumab      |                |                             |     |         |
|---------|----------------|----------------|----------------------------|--------|----------|----------------|----------------|-----------------------------|-----|---------|
|         | Day -2         |                | Day 10                     |        | p-value* | Day -2         |                | Day 10                      |     | p-value |
|         | Mean (±SD) #   | Change         | Mean (±SD)                 | change |          |                |                |                             |     |         |
| IL-18   | 34.8 (±18.9)   | 32.2 (±17.7)   | -2.6; 95% CI: -9.6, 4.3    | - Ψ    | 0.429    | 46.9 (±15.5)   | 37.6 (±12.6)   | -9.3; 95% CI: -18.9, 0.2    | - Ψ | 0.054   |
| BDNF    | 144.4 (±217.6) | 174.3 (±191)   | 29.9; 95% CI: -109.2, 169  | -      | 0.651    | 91.5 (±105.6)  | 279.6 (±274.6) | 188.1; 95% CI: 50.8, 325.4  | ↑   | 0.012   |
| VEGF-A  | 455.6 (±391.8) | 525.1 (±359.6) | 69.5; 95% CI: -98.1, 237.2 | -      | 0.389    | 362.1 (±184.7) | 610.4 (±310.2) | 248.3; 95% CI: 103.8, 392.9 | ↑   | 0.003   |
| PIGF-1  | 49.2 (±29)     | 67.4 (±38.6)   | 18.1; 95% CI: -0.8, 37.1   | -      | 0.059    | 55.8 (±28.7)   | 87.1 (±41)     | 31.3; 95% CI: 12.2, 50.5    | ↑   | 0.004   |
| SCF     | 6.3 (±4.6)     | 6.8 (±3.7)     | 0.5; 95% CI: -0.6, 1.6     | -      | 0.316    | 5.5 (±3.2)     | 6.6 (±4.1)     | 1.1; 95% CI: 0.2, 2         | ↑   | 0.023   |
| HGF     | 73 (±43.9)     | 125.5 (±72.4)  | 52.5; 95% CI: 23.9, 81.1   | ↑      | 0.001    | 89.6 (±41.1)   | 187.2 (±89.5)  | 97.6; 95% CI: 63.7, 131.6   | ↑   | <0.001  |
| PDGF-BB | 34.6 (±31)     | 77.5 (±78.4)   | 42.9; 95% CI: 0.3, 85.5    | ↑      | 0.048    | 48 (±49.5)     | 159.2 (±219.4) | 111.1; 95% CI: -1, 223.3    | -   | 0.052   |
| IP-10   | 28.2 (±16.5)   | 12.3 (±8)      | -15.9; 95% CI: -23.1, -8.7 | ↓      | <0.001   | 30.9 (±20.2)   | 13.4 (±6.7)    | -17.5; 95% CI: -29, -6      | ↓   | 0.006   |

# Standard Deviation (SD)

\*: P-value = difference within groups before (day-2) and after treatment (day 10) and controls. CI= confidence intervals

Ψ Increase (↑) Decrease (↓) No change (-)

IL= Interleukin; Brain Derived Neutrophic Factor (BDNF); Interferon gamma inducible protein-10 (IP-10); Placental Growth Factor (PIGF); Stem cell Factor (SCF); Hepatocyte Growth Factor (HGF); Vascular Endothelial Growth Factor A (VEGF-A); Platelet Derived Growth Factor- (PDGF).
